# Supplementary material for: Generating high-resolution land use and land cover maps for the greater Mariño watershed in 2019 with machine learning
Source: Springer Nature journal article supplement (doi:10.1038/s41597-024-03750-x), 2024-08-23
Supplement: 41597_2024_3750_MOESM1_ESM.pdf [file 41597_2024_3750_MOESM1_ESM.pdf]

# Generating high-resolution land use and land cover maps for the greater Mariño watershed in 2019 with machine learning (Supplementary materials)

Table SM 1: Satellite images references.

| Satellite product | Tiles                                    | Date                          | Specific image references                                                                                                                                                                                                                                                          |
|-------------------|------------------------------------------|-------------------------------|------------------------------------------------------------------------------------------------------------------------------------------------------------------------------------------------------------------------------------------------------------------------------------|
| TanDEM-X          | S14W073<br>S14W074<br>S15W073<br>S15W074 | -                             | TDM1_DEM__04_S14W073_DEM.tif<br>TDM1_DEM__04_S14W074_DEM.tif<br>TDM1_DEM__04_S15W073_DEM.tif<br><br>TDM1_DEM__04_S15W074_DEM.tif                                                                                                                                                   |
| Pléiades          | W074S14<br>W073S14                       | 07/10/2019                    | 2020-112_Vallet_SO20225702-1-01_DS_PHR1B_201910071516024_FR1_PX_WO74S14_1205_06640.zip<br><br>2020-112_Vallet_SO20225702-2-01_DS_PHR1B_201910071515444_FR1_PX_WO73S14_0207_04978.zip<br><br>2020-112_Vallet_SO20225702-3-01_DS_PHR1B_201910071515139_FR1_PX_WO73S14_0407_04222.zip |
| Sentinel-2        | T18LYK (South)<br>T18LYL (North)         | 01/01/2018<br>–<br>30/10/2019 |                                                                                                                                                                                                                                                                                    |

Table SM 2: Summary of the field database.

| Land-use land-cover description       |                               |                                       |                            | Reference database                                                         |                                                                           |                                            | Validation database                                                        |                                                                           |                                            |
|---------------------------------------|-------------------------------|---------------------------------------|----------------------------|----------------------------------------------------------------------------|---------------------------------------------------------------------------|--------------------------------------------|----------------------------------------------------------------------------|---------------------------------------------------------------------------|--------------------------------------------|
|                                       |                               |                                       |                            | Number of polygons (percentage of total number of polygons in the dataset) | Total surface in km <sup>2</sup> (percentage of total surface in dataset) | Average size of polygons (m <sup>2</sup> ) | Number of polygons (percentage of total number of polygons in the dataset) | Total surface in km <sup>2</sup> (percentage of total surface in dataset) | Average size of polygons (m <sup>2</sup> ) |
| Level 1                               | Level 2                       | Level 3                               | Code                       |                                                                            |                                                                           |                                            |                                                                            |                                                                           |                                            |
| Agricultural areas                    | Agricultural areas            | Sugar cane                            | 1                          | 23 (1.4%)                                                                  | 0.03 (0.2%)                                                               | 1 582                                      | 23 (1.5%)                                                                  | 0.03 (0.2%)                                                               | 1 582                                      |
|                                       |                               | Pasture, fallow and feed              | 2                          | 245 (14.4%)                                                                | 0.69 (4.1%)                                                               | 2 839                                      | 237 (15.5%)                                                                | 0.69 (4.2%)                                                               | 2 912                                      |
|                                       |                               | Crop and alfalfa                      | 3                          | 353 (20.8%)                                                                | 0.67 (4.0%)                                                               | 1 906                                      | 322 (21%)                                                                  | 0.64 (4.0%)                                                               | 2 023                                      |
|                                       |                               | Fruit crop                            | 4                          | 52 (3.1%)                                                                  | 0.09 (0.5%)                                                               | 1 737                                      | 52 (3.4%)                                                                  | 0.09 (0.5%)                                                               | 1 737                                      |
| Natural spaces and forest plantations | Woodlands                     | Polylepis mountain forest             | 5                          | 23 (1.4%)                                                                  | 0.16 (0.9%)                                                               | 7 010                                      | 23 (1.5%)                                                                  | 0.16 (0.9%)                                                               | 7 010                                      |
|                                       |                               | Podocarpus glomeratus mountain forest | 6                          | 26 (1.5%)                                                                  | 0.86 (5.1%)                                                               | 33 186                                     | 26 (1.7%)                                                                  | 0.86 (5.3%)                                                               | 33 186                                     |
|                                       |                               | Dry forest                            | 7                          | 56 (3.3%)                                                                  | 1.26 (7.5%)                                                               | 22 651                                     | 49 (3.2%)                                                                  | 0.99 (6.1%)                                                               | 20 333                                     |
|                                       |                               | Other tree vegetation                 | 8                          | 320 (18.8%)                                                                | 1.93 (11.5%)                                                              | 6 035                                      | 233 (15.2%)                                                                | 1.83 (11.4%)                                                              | 7 894                                      |
|                                       | Shrubs and natural grasslands | Pine plantation                       | 9                          | 40 (2.4%)                                                                  | 0.17 (1.0%)                                                               | 4 311                                      | 32 (2.1%)                                                                  | 0.12 (0.7%)                                                               | 3 955                                      |
|                                       |                               | Eucalyptus plantation                 | 10                         | 82 (4.8%)                                                                  | 0.99 (5.9%)                                                               | 12 174                                     | 73 (4.8%)                                                                  | 0.98 (6.0%)                                                               | 13 509                                     |
|                                       |                               | Mixed shrubland                       | 11                         | 83 (4.9%)                                                                  | 0.76 (4.5%)                                                               | 9 202                                      | 80 (5.2%)                                                                  | 0.76 (4.7%)                                                               | 9 510                                      |
|                                       |                               | Dry shrubland and semi-arid steppe    | 12                         | 46 (2.7%)                                                                  | 1.13 (6.7%)                                                               | 24 574                                     | 45 (2.9%)                                                                  | 1.12 (6.9%)                                                               | 25 105                                     |
|                                       |                               | High-elevation grassland              | 13                         | 53 (3.1%)                                                                  | 4.51 (26.8%)                                                              | 85 018                                     | 51 (3.3%)                                                                  | 4.41 (27.7%)                                                              | 88 085                                     |
|                                       |                               | Rocks and natural bare soils          | Rock and natural bare soil | 14                                                                         | 44 (2.6%)                                                                 | 1.09 (6.5%)                                | 24 890                                                                     | 44 (2.9%)                                                                 | 1.09 (6.7%)                                |
| Water and glacier                     | Water                         | Beach and riverine rock               | 15                         | 14 (0.8%)                                                                  | 0.03 (0.1%)                                                               | 2 183                                      | 14 (0.9%)                                                                  | 0.03 (0.1%)                                                               | 2 183                                      |
|                                       |                               | Glacier                               | 16                         | 6 (0.4%)                                                                   | 0.26 (1.5%)                                                               | 44 271                                     | 6 (0.4%)                                                                   | 0.26 (1.6%)                                                               | 44 271                                     |
|                                       |                               | Wetland                               | 17                         | 58 (3.4%)                                                                  | 0.68 (4.0%)                                                               | 11 730                                     | 58 (3.8%)                                                                  | 0.67 (4.1%)                                                               | 11 670                                     |
|                                       |                               | Lake                                  | 18                         | 35 (2.1%)                                                                  | 0.57 (3.4%)                                                               | 16 559                                     | 26 (1.7%)                                                                  | 0.49 (3.0%)                                                               | 18 851                                     |
| Impervious areas                      | Impervious areas              | River network                         | 19                         | 19 (1.1%)                                                                  | 0.02 (0.1%)                                                               | 1 176                                      | 19 (1.2%)                                                                  | 0.02 (0.1%)                                                               | 1 176                                      |
|                                       |                               | Built-up area                         | 20                         | 120 (7.1%)                                                                 | 0.78 (4.7%)                                                               | 6 571                                      | 118 (7.7%)                                                                 | 0.78 (4.8%)                                                               | 6 645                                      |
| <b>Total</b>                          |                               |                                       |                            | <b>1,698 (100%)</b>                                                        | <b>16.75 (100%)</b>                                                       | <b>9 866</b>                               | <b>1,531 (100%)</b>                                                        | <b>16.18 (100%)</b>                                                       | <b>10 579</b>                              |

Table SM 3: Data source and criteria used for post-processing MORINGA output map.

| LULC class                            | Code | Data source for GIS cross-checking            | Criteria                                                                                                                                                                                        | Reference                          |
|---------------------------------------|------|-----------------------------------------------|-------------------------------------------------------------------------------------------------------------------------------------------------------------------------------------------------|------------------------------------|
| Sugar cane                            | 1    | Agricultural areas in 2018 (national map)     | Intersect the agricultural surface layer and exclusively located near the Pachachaca River. Easily identifiable on the Pléiades image in false (bright red) and true (specific texture) colors. | (Livia Alejandro et al., 2021)     |
| Pasture, fallow and feed              | 2    | Agricultural areas in 2018 (national map)     | Intersect the agricultural surface layer.                                                                                                                                                       | (Livia Alejandro et al., 2021)     |
| Crop and alfalfa                      | 3    | Agricultural areas in 2018 (national map)     | Intersect the agricultural surface layer.                                                                                                                                                       | (Livia Alejandro et al., 2021)     |
| Fruit crop                            | 4    | Agricultural areas in 2018 (national map)     | Intersect the agricultural surface layer. Easily identifiable on the Pléiades image (in true color): rows of trees with distinct texture                                                        | (Livia Alejandro et al., 2021)     |
| Polylepis mountain forest             | 5    |                                               | Located above 3500m. Distinctive texture and color (dark red, dense tree canopy) on the Pléiades image (in false color).                                                                        |                                    |
| Podocarpus glomeratus mountain forest | 6    | Vegetation cover (national map)               | Intersect the mesoandean coniferous relic forest on the vegetation cover map.                                                                                                                   | (MINAM, 2015)                      |
| Dry forest                            | 7    |                                               | The only tree vegetation located in low altitude, easily identifiable on the Pléiades image (in false color): medium intensity red.                                                             |                                    |
| Other tree vegetation                 | 8    | No specific criteria used.                    |                                                                                                                                                                                                 |                                    |
| Pine plantation                       | 9    |                                               | Located above 3000m. Distinctive texture and color (bright red, dense tree canopy) on the Pléiades image (in false color).                                                                      |                                    |
| Eucalyptus plantation                 | 10   | Agricultural areas in 2018 (national map)     | Intersect the agricultural surface layer . Very distinct from other agricultural LULC categories mapped in the national map of agricultural areas (i.e. it was the only tree vegetation)        | (Livia Alejandro et al., 2021)     |
| Mixed shrubland                       | 11   | Digital Elevation Model                       | Located above 2500m.                                                                                                                                                                            | (Wessel, 2018)                     |
| Dry shrubland and semi-arid steppe    | 12   | Digital Elevation Model                       | Located below 2500m, dry appearance in Pléiades image (in false color): they were less red and less dense than high altitude shrublands.                                                        | (Wessel, 2018)                     |
| High-elevation grassland              | 13   | Digital Elevation Model                       | Located above 2500m.                                                                                                                                                                            | (Wessel, 2018)                     |
| Rock and natural bare soil            | 14   | No specific criteria used.                    |                                                                                                                                                                                                 |                                    |
| Beach and riverine rock               | 15   |                                               | Located along the river network.                                                                                                                                                                |                                    |
| Glacier                               | 16   |                                               | Only located at the top of the Ampay mountain.                                                                                                                                                  |                                    |
| Wetland                               | 17   |                                               | Located above 3500m. Wetlands appear in a bright red color on Pléiades image (in false color).                                                                                                  |                                    |
| Lake                                  | 18   | Surface water maximum extent (GSWE)           | Intersect the maximum water extent layer.                                                                                                                                                       | (Pekel et al., 2016)               |
| River network                         | 19   | Surface water maximum extent (GSWE)           | Intersect the maximum water extent layer.                                                                                                                                                       | (Pekel et al., 2016)               |
| Built-up area                         | 20   | GHS built-up surface in 2018 (10m resolution) | Intersect the built-up areas cross-checking layer. Buildings easily identifiable on the very high-resolution Pleiades image (in true color).                                                    | (Pesaresi and Politis, 2022)       |
| Road                                  | 21   | OpenStreetMap                                 | Intersect the OpenStreetMap major road layer.                                                                                                                                                   | (OpenStreetMap contributors, 2022) |

Figure SM 1: Location of changes made during post-treatment.

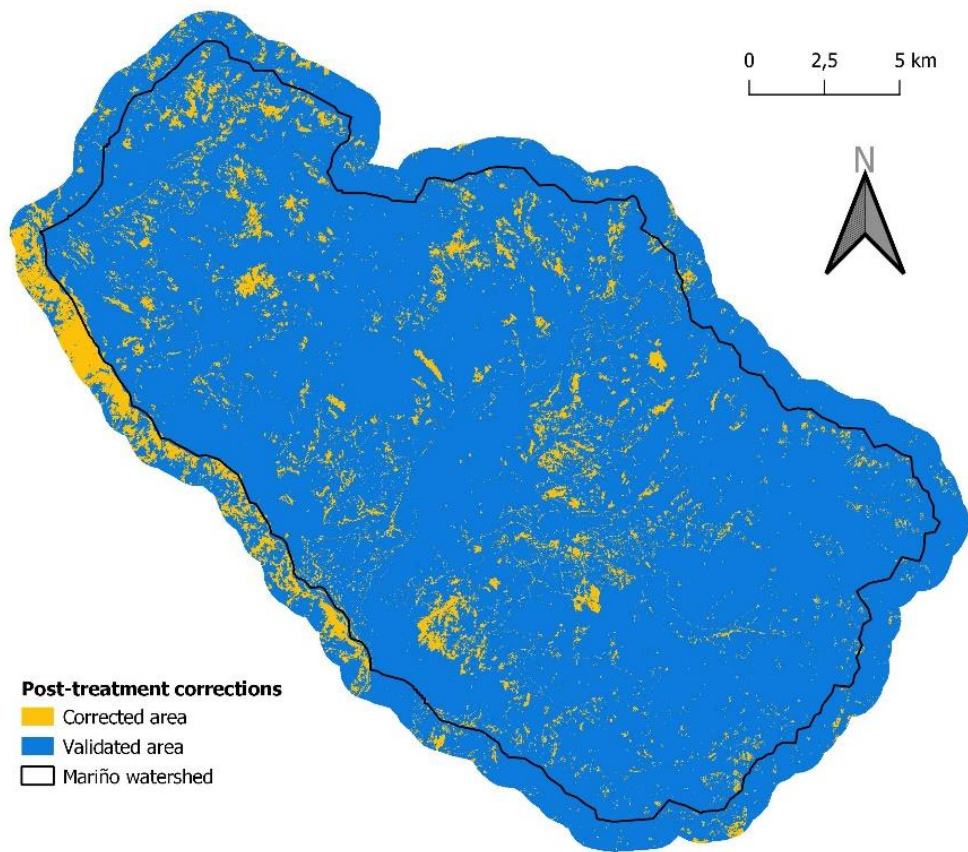

Table SM 4: Corrections applied to the MORINGA classification (rows) during post-treatment (columns). Grey cells on the diagonal correspond to the 91.5% of the study area to which no changes were applied during post-treatment. The percentages represent the proportion of changes made between different LULC classes during post-treatment, relative to the area that each LULC class occupy in the MORINGA output (i.e. they were calculated considering all pixels falling in the different LULC classes).

| Moringa output \ Post-treatment       |            |                          |                  |            |                           |                                       |            |                       |                 |                       |                 |                                    |                          |                            |                         |         |         |      |               |               |      |       |
|---------------------------------------|------------|--------------------------|------------------|------------|---------------------------|---------------------------------------|------------|-----------------------|-----------------|-----------------------|-----------------|------------------------------------|--------------------------|----------------------------|-------------------------|---------|---------|------|---------------|---------------|------|-------|
|                                       | Sugar cane | Pasture, fallow and feed | Crop and alfalfa | Fruit crop | Polylepis mountain forest | Podocarpus glomeratus mountain forest | Dry forest | Other tree vegetation | Pine plantation | Eucalyptus plantation | Mixed shrubland | Dry shrubland and semi-arid steppe | High-elevation grassland | Rock and natural bare soil | Beach and riverine rock | Glacier | Wetland | Lake | River network | Built-up area | Road | Total |
| Sugar cane                            | 100%       | 0%                       | 0%               | 0%         | 0%                        | 0%                                    | 0%         | 0%                    | 0%              | 0%                    | 0%              | 0%                                 | 0%                       | 0%                         | 0%                      | 0%      | 0%      | 0%   | 0%            | 0%            | 0%   | 100%  |
| Pasture, fallow and feed              | 0%         | 95%                      | 0%               | 0%         | 0%                        | 1%                                    | 0%         | 1%                    | 0%              | 0%                    | 0%              | 0%                                 | 1%                       | 0%                         | 0%                      | 0%      | 1%      | 0%   | 0%            | 0%            | 0%   | 100%  |
| Crop and alfalfa                      | 0%         | 0%                       | 67%              | 0%         | 0%                        | 0%                                    | 0%         | 0%                    | 0%              | 0%                    | 0%              | 27%                                | 0%                       | 4%                         | 0%                      | 0%      | 0%      | 0%   | 0%            | 0%            | 1%   | 100%  |
| Fruit crop                            | 0%         | 0%                       | 1%               | 52%        | 0%                        | 0%                                    | 0%         | 47%                   | 0%              | 0%                    | 0%              | 0%                                 | 0%                       | 0%                         | 0%                      | 0%      | 0%      | 0%   | 0%            | 0%            | 0%   | 100%  |
| Polylepis mountain forest             | 0%         | 0%                       | 0%               | 0%         | 52%                       | 0%                                    | 0%         | 29%                   | 0%              | 1%                    | 2%              | 0%                                 | 1%                       | 13%                        | 0%                      | 0%      | 1%      | 0%   | 0%            | 0%            | 0%   | 100%  |
| Podocarpus glomeratus mountain forest | 0%         | 0%                       | 0%               | 0%         | 0%                        | 86%                                   | 0%         | 13%                   | 0%              | 1%                    | 0%              | 0%                                 | 0%                       | 0%                         | 0%                      | 0%      | 0%      | 0%   | 0%            | 0%            | 0%   | 100%  |
| Dry forest                            | 0%         | 0%                       | 0%               | 0%         | 0%                        | 0%                                    | 96%        | 1%                    | 0%              | 0%                    | 2%              | 0%                                 | 0%                       | 0%                         | 0%                      | 0%      | 0%      | 0%   | 0%            | 0%            | 0%   | 100%  |
| Other tree vegetation                 | 0%         | 0%                       | 0%               | 0%         | 0%                        | 0%                                    | 0%         | 94%                   | 0%              | 5%                    | 0%              | 0%                                 | 0%                       | 0%                         | 0%                      | 0%      | 0%      | 0%   | 0%            | 0%            | 0%   | 100%  |
| Pine plantation                       | 0%         | 0%                       | 0%               | 0%         | 0%                        | 1%                                    | 0%         | 30%                   | 58%             | 0%                    | 9%              | 0%                                 | 0%                       | 2%                         | 0%                      | 0%      | 0%      | 0%   | 0%            | 0%            | 0%   | 100%  |
| Eucalyptus plantation                 | 0%         | 0%                       | 0%               | 0%         | 0%                        | 0%                                    | 0%         | 10%                   | 1%              | 82%                   | 4%              | 0%                                 | 0%                       | 1%                         | 0%                      | 0%      | 0%      | 0%   | 0%            | 0%            | 0%   | 100%  |
| Mixed shrubland                       | 0%         | 0%                       | 0%               | 0%         | 0%                        | 0%                                    | 0%         | 0%                    | 0%              | 0%                    | 98%             | 0%                                 | 0%                       | 0%                         | 0%                      | 0%      | 0%      | 0%   | 0%            | 0%            | 0%   | 100%  |
| Dry shrubland and semi-arid steppe    | 0%         | 0%                       | 0%               | 0%         | 0%                        | 0%                                    | 0%         | 0%                    | 0%              | 0%                    | 17%             | 82%                                | 0%                       | 0%                         | 0%                      | 0%      | 0%      | 0%   | 0%            | 0%            | 0%   | 100%  |
| High-elevation grassland              | 0%         | 0%                       | 0%               | 0%         | 0%                        | 0%                                    | 0%         | 0%                    | 0%              | 0%                    | 0%              | 0%                                 | 99%                      | 1%                         | 0%                      | 0%      | 0%      | 0%   | 0%            | 0%            | 0%   | 100%  |
| Rock and natural bare soil            | 0%         | 0%                       | 0%               | 0%         | 0%                        | 0%                                    | 0%         | 0%                    | 0%              | 0%                    | 0%              | 0%                                 | 0%                       | 99%                        | 0%                      | 0%      | 0%      | 0%   | 0%            | 0%            | 0%   | 100%  |
| Beach and riverine rock               | 0%         | 0%                       | 0%               | 0%         | 0%                        | 0%                                    | 0%         | 0%                    | 0%              | 0%                    | 0%              | 6%                                 | 0%                       | 76%                        | 12%                     | 0%      | 0%      | 0%   | 0%            | 1%            | 4%   | 100%  |
| Glacier                               | 0%         | 0%                       | 0%               | 0%         | 0%                        | 0%                                    | 0%         | 0%                    | 0%              | 0%                    | 0%              | 0%                                 | 0%                       | 0%                         | 0%                      | 100%    | 0%      | 0%   | 0%            | 0%            | 0%   | 100%  |
| Wetland                               | 0%         | 1%                       | 0%               | 0%         | 0%                        | 0%                                    | 0%         | 1%                    | 1%              | 0%                    | 15%             | 0%                                 | 15%                      | 3%                         | 0%                      | 0%      | 63%     | 0%   | 0%            | 0%            | 0%   | 100%  |
| Lake                                  | 0%         | 0%                       | 0%               | 0%         | 0%                        | 0%                                    | 1%         | 2%                    | 0%              | 0%                    | 3%              | 1%                                 | 0%                       | 57%                        | 0%                      | 0%      | 0%      | 36%  | 0%            | 0%            | 0%   | 100%  |
| River network                         | 0%         | 0%                       | 0%               | 0%         | 0%                        | 0%                                    | 4%         | 0%                    | 0%              | 0%                    | 0%              | 1%                                 | 0%                       | 33%                        | 5%                      | 0%      | 0%      | 0%   | 57%           | 0%            | 0%   | 100%  |
| Built-up area                         | 0%         | 0%                       | 0%               | 0%         | 0%                        | 0%                                    | 0%         | 0%                    | 0%              | 0%                    | 0%              | 3%                                 | 1%                       | 11%                        | 0%                      | 0%      | 0%      | 0%   | 0%            | 77%           | 6%   | 100%  |
| No data                               | 0%         | 6%                       | 0%               | 0%         | 0%                        | 0%                                    | 3%         | 27%                   | 0%              | 6%                    | 24%             | 2%                                 | 19%                      | 7%                         | 0%                      | 0%      | 4%      | 0%   | 0%            | 0%            | 0%   | 100%  |

Table SM 5: Description of the information provided for each polygon of the final LULC classification (the data is provided as a geopackage file, with one layer for each level of the nomenclature).

| Attribute name | Data type | Description                                 | Example                               |
|----------------|-----------|---------------------------------------------|---------------------------------------|
| fid            | Numeric   | Unique ID                                   | 23151                                 |
| Code1          | Numeric   | Level 1 land-use land-cover code associated | 2                                     |
| Level1         | Text      | Level 1 land-use land-cover name associated | Natural spaces and forest plantations |
| Code2          | Numeric   | Level 2 land-use land-cover code associated | 3                                     |
| Level2         | Text      | Level 2 land-use land-cover name associated | Shrubs and natural grasslands         |
| Code3          | Numeric   | Level 3 land-use land-cover code associated | 11                                    |
| Level3         | Text      | Level 3 land-use land-cover name associated | Mixed shrubland                       |
| area_m2        | Numeric   | Area of the polygon (m <sup>2</sup> )       | 17.683                                |

Table SM 6: Description of the information recorded for each polygon of the field database (the data is provided as a geopackage file, for level 3 of the nomenclature).

| Attribute name | Data type | Description                                 | Example                               |
|----------------|-----------|---------------------------------------------|---------------------------------------|
| fid            | Numeric   | Unique ID                                   | 71                                    |
| Code1          | Numeric   | Level 1 land-use land-cover code associated | 2                                     |
| Level1         | Text      | Level 1 land-use land-cover name associated | Natural spaces and forest plantations |
| Code2          | Numeric   | Level 2 land-use land-cover code associated | 2                                     |
| Level2         | Text      | Level 2 land-use land-cover name associated | Woodlands                             |
| Code3          | Numeric   | Level 3 land-use land-cover code associated | 10                                    |
| Level3         | Text      | Level 3 land-use land-cover name associated | Eucalyptus plantation                 |

## References

- Livia Alejandro, L., Sánchez Manayay, R., Galiano Uscapi, A., Cajas Ardiles, J., Arévalo Chong, E., Rosas Quispe, E., 2021. Atlas de la superficie agrícola del Perú. MIDAGRI - Dirección General de Estadística, Seguimiento y Evaluación de Políticas, Lima, Peru.
- MINAM, 2019. Mapa nacional de ecosistemas del Perú - Memoria descriptiva. Dirección General de Ordenamiento Territorial Ambiental, Lima, Peru.
- OpenStreetMap contributors, 2022. Planet dump retrieved from <https://planet.osm.org>.
- Pekel, J.-F., Cottam, A., Gorelick, N., Belward, A.S., 2016. High-resolution mapping of global surface water and its long-term changes. *Nature* 540, 418–422. <https://doi.org/10.1038/nature20584>
- Pesaresi, M., Politis, P., 2022. GHS-BUILT-S R2022A - GHS built-up surface grid, derived from Sentinel2 composite and Landsat, multitemporal (1975-2030). <https://doi.org/10.2905/D07D81B4-7680-4D28-B896-583745C27085>
- Wessel, B., 2018. TanDEM-X Ground Segment – DEM Products Specification Document (TD-GS-PS-0021 No. Issue 3.2). EOC, DLR, Oberpfaffenhofen, Germany.
